The utility of Saw-scaled viper, *Echis pyramidum*, and Kenyan sand boa, *Eryx colubrinus* as bioindicator of heavy metals bioaccumulation in relation to DPTA soil extract and biological consequences.

Doha M. M. Sleem<sup>1\*</sup>, Mohamed A. M. Kadry<sup>1</sup>, Eman M. E. Mohallal<sup>2</sup>, Mohamed A. Marie<sup>1</sup>

<sup>1</sup> Zoology Department Faculty of Science, Cairo University, Cairo, Egypt.

<sup>2</sup> Ecology unit of desert animals, Desert research center, Cairo, Egypt.

Corresponding author e-mail: dohasleem90@gmail.com

### **Abstract:**

The present investigation was conducted to compare between the ecotoxicological effects of Ca, Mg, Fe, Cu, Zn, Co, Mo, Mn, B, Al, Sr, Pb, Ni, Cd and Cr on the saw-scaled viper, *Echis pyramidum* (*E. p.*) and the Kenyan sand boa, *Eryx colubrinus* (*E. c.*) inhabiting Gabal El-Nagar and Kahk Qibliyyah respectively in El-Faiyum desert, Egypt. Accumulation varied significantly among the liver, kidney and muscle. The relationship between concentrations of heavy metals in snakes and those in the soil from the collected sites was established by analyzing metal DPTA in soil. Bioaccumulation factor is calculated to estimate the degree of toxicity within the tissues. Morphometric analysis was recorded. All body morphometric measurements were higher in *E. p.* than in *E. c.*. Body, liver, gonad, kidney and heart weight, HSI, GSI, RBCs count, Hb content, PCV, MCV, MCH, MCHC, plasma glucose, total lipids and total proteins showed a significant increase in *E. p.* Histopathological examination showed damage and alterations of liver, kidney and testes sections. The tissues of *E. c.* were more destructed than those of *E. p.*.

**Key words:** *Echis pyramidum*, *Eryx colubrinus*, heavy metals, DPTA, Accumulation, Bioaccumulation factor, Biological parameters, Morphometrics.

### **Introduction**

Little is known about snakes in the field of ecotoxicology and it needs several investigations (Albers *et al.*, 2000; Hopkins, 2000; Sparling *et al.*, 2000 and Selcer, 2005); because snakes are cold blooded (poikilothermic) animals, and they have low rates of catabolism, thus, they may maintain higher body burdens of contaminants (Gibbons *et al.*, 2000). As environmental contaminant is considered one of the major six factors, that contributes to the decline of the snake populations (Todd *et al.*, 2010), therefore, studies have been increased over the last decade seeking for the conservation of the snakes, and assert on the role played by the bioindicators in the change of the response to a certain stress, and this will guide to the endangered snake species (Hopkins *et al.*, 1999&2001; Burger *et al.*, 2005, 2006&2007; Campbell *et al.*, 2005; Albrecht *et al.*, 2007; Wylie *et al.*, 2009 and Rezaie-Atagholipour *et al.*, 2012).

The objective of this study was to determine whether the saw-scaled viper, *Echis pyramidum* or the Kenyan sand boa, *Eryx colubrinus* as bioindicator of the internal exposure of metal.

In this investigation the level of heavy metals in the soil were analyzed, because snakes are mainly found on the top surface of the soil, which is mainly contaminated with more heavy metals than the bottom (Olafisoye *et al.*, 2013).

Since the environmental contaminants exert deleterious effects on snakes causing alteration of morphometric characteristics, genetic effects, behavioral parameters and tissue residue levels (Irwin and Irwin, 2005 and Walker *et al.*, 2012), morphometrics, hematology and plasma biochemistry, and histopathology were conducted in this current work to aid in choosing the suitable bioindicator.

## Materials and methods:

### Collection site:

Eight specimens of both types of selected snakes *Echis pyrimidum* and *Eryx colubrinus* were collected from two different sites in El- Faiyum desert, Egypt.

#### Site 1 [Gabal El-Nagar] (Fig.1.):

Specimens of saw-scaled viper; *Echis pyrimidum* as well as soil samples were collected during the summer season from Gabal El-Nagar (Mahatet El-Rafa); a rocky area near a water drainage and a cultivated area planted with wheat. Global Position System (GPS) of El-Faiyum: [29° 22` N 30° 37` E].

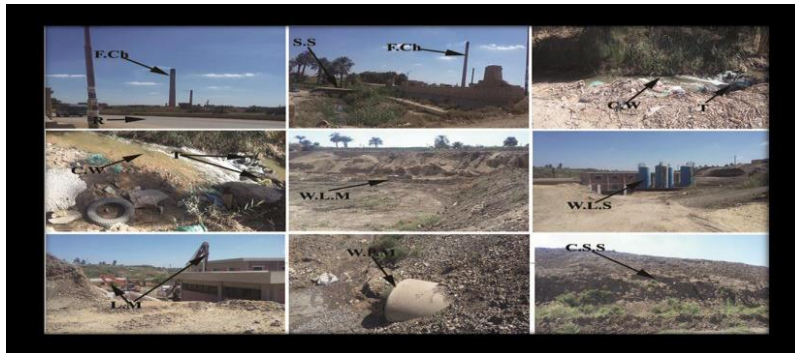

Fig .1. Photomicrograph shows contaminated sites in Gabal El-Nagar

C.W: Contaminated water; T: Trash; W.L.M: Water lifting machine; W.L.S: Water lifting station; L.M: Lifting machine; W.P.M: Water pumping machine C.S.S: Collected soil samples.

#### Site 2 [Kahk Qibliyyah, Abshowy] (Fig.2.):

Specimens of Kenyan sand boa; *Eryx colubrinus* as well as soil samples were collected during the summer season from Kahk Qibliyyah; a planted area near a sandy road. Global Positioning System (GPS): [29° 24` N 30° 38` E]

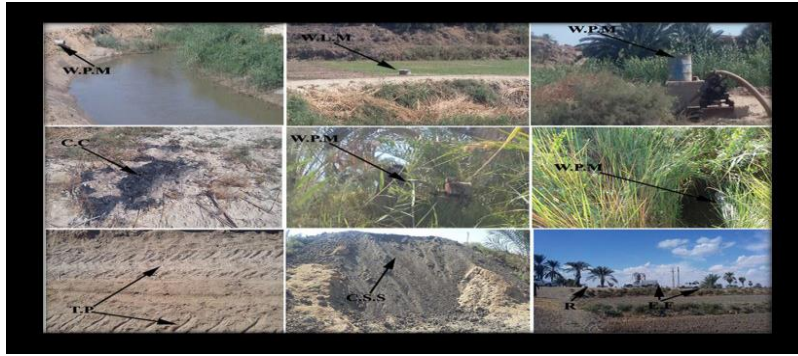

Fig .2. Photomicrograph shows contaminated site in Kahk Qibliyyah  
C.C: Contaminated coal; T.P: Tractor's print; C.S.S: Collected soil samples; R: Road;  
E.F: Exhausted fumes; W.P.M.: Water Pumping Machine  
and W.L.M.: Water Lifting Machine.

#### **Morphometric measurements:**

The snakes were separated and anaesthetized, SVL (Snout-vent length) (mm), TL (Tail length) (mm), TBL (Total body length) (mm), and HL (Head length) (mm) were measured by using Vernier caliper. Body, liver, heart, and kidney weight (g); hepatosomatic index (HIS), and gonadosomatic index (GSI) were estimated. These data gives a precise evaluation of the status of the snake's body during the study (**Gómez *et al.*, 2016**).

#### **Blood Collection and hematology:**

Blood samples were taken from the heart into the heparinized eppendorf tubes after the snakes being decapitated. Neubauer haemocytometer was used to determine red blood corpuscles count (RBCs). Hemoglobin was estimated spectrophotometrically in whole blood collected in heparin according to the method of **Drabkin and Austin (1932)** using a kit of Biodiagnostics Company. Hematocrit centrifuge was used to measure packed cell volume (PCV). Blood indices [Mean Corpuscular Volume (MCV), Mean Corpuscular Hemoglobin (MCH), and Mean Corpuscular Hemoglobin Concentration (MCHC)] were calculated according to **Gupta (1970)**.

#### **Plasma Biochemistry:**

A part of blood was centrifuged for five minutes at 10000 rpm. The plasma was removed, placed in another clean eppendorf tubes, immediately frozen at -20°C and stored for biochemical analyses. Plasma glucose was estimated spectrophotometrically according to the method of **Trinder (1969)** using a kit of Biodiagnostics Company. Plasma total lipids were estimated spectrophotometrically according to the method of **Zöllner and Kirsch (1962)** using a kit of Biodiagnostics Company. Plasma total proteins were determined spectrophotometrically according to the method of **Gornall *et al.* (1949)** using the kit of Biodiagnostics company.

#### **Heavy metals bioaccumulation in liver, kidney, and muscle tissues of snakes:**

0.5 g of each tissue, 7 ml of HNO<sub>3</sub> (65%) and 1 ml of H<sub>2</sub>O<sub>2</sub> (30%) reagents were added in a closed vessel to be put inside the temperature control microwave digestion for the metal determination by the spectroscopic method. The samples were left to be cooled for 24 hours in the room temperature, and then the digested solutions were transferred to 25 ml conical to be diluted; finally, they were ready to be measured by using ICAP (Inductive Coupled Argon Plasma), after they were calibrated at 0.05 ppm.

### **Heavy metals in available soil:**

The determination of heavy metals in available soil was according to the method of **Soltanpour and Schwab (1977)**.

### **Bioaccumulation Factor (BAF)**

$$\text{BAF} = \frac{\text{Mean concentration of snakes' tissues (liver, kidney and muscle)}}{\text{Mean concentration of available soil}}$$

### **Histopathological examination:**

Autopsy samples were taken from the liver, kidney and testes of the two selected studied snakes according to **(Bancroft and Gamble, 2002)**.

### **Statistical analysis:**

Pairwise significance tests were made using Student's *t-test* to compare between Kenyan sand boa, *Eryx colubrinus* and saw-scaled viper, *Echis pyramidum* in all studied blood parameters and heavy metals bioaccumulation in their different tissues. A probability level at (**P<0.05**) was considered as significant, at (**P<0.01**) was considered as highly significant and at (**P<0.001**) was considered as very highly significant.

All statistics were carried out using statistical analysis program; Predictive Analytics Software (**PASW statistics 18.0 Release 18.0.0**).

### **Ethical considerations:**

We follow scientific ethics in selection and handling of snakes. Our Institutional Animal Care and Use Committee (IACUC) at Zoology Department, Faculty of Science, Cairo University has approved this study protocol from the ethical point of view and according to Animal welfare Act of the Ministry of Agriculture in Egypt that enforces the humane treatment of animal.

### **Results:**

Body morphometric analyses showed that the mean values of all studied measured parameters in the saw-scaled viper, *Echis pyramidum* (*E. p.*) were higher than those in the Kenyan sand boa, *Eryx colubrinus* (*E. c.*) (Table 1).

Changes in body weight, liver, gonads, kidney and heart weight; hepato-somatic index (HSI) and gonado-somatic index (GSI) were higher in the saw-scaled viper, *Echis pyramidum* (*E. p.*) than in the Kenyan sand boa, *Eryx colubrinus* (*E. c.*), and showed a very highly significant increase ( $P < 0.001$ ) (Table 2).

*Echis pyramidum* (*E. p.*) showed a very highly significant increase ( $P < 0.001$ ) in all studied blood parameters; Red blood corpuscles (RBCs) count, Hemoglobin content (Hb) and Packed cell volume (PCV) than in *Eryx colubrinus* (*E. c.*) (Table 3).

*Echis pyramidum* (*E. p.*) showed a very highly significant increase ( $P < 0.001$ ) in calculated blood indices; mean corpuscular volume (MCV), mean corpuscular hemoglobin (MCH) and mean corpuscular hemoglobin concentration (MCHC) than in *Eryx colubrinus* (*E. c.*) (Table 4).

*Echis pyramidum* (*E. p.*) recorded a very highly significant increase ( $P < 0.001$ ) in plasma glucose, total lipids and total protein than in *Eryx colubrinus* (*E. c.*) (Table 5).

Essential heavy metals [Ca, Fe, Cu, Zn] in soils collected from Kahk Qibliyyah showed a highly significant increase ( $P < 0.001$ ) than those in soils collected from Gabal El-Nagar, except Mo, which was significantly higher in Gabal El Nagar [ $0.085 \pm 0.005$ ] than in Kahk Qibliyyah [ $0.038 \pm 0.009$ ] ( $P < 0.001$ ). Mg concentrations recorded a highly significant increase ( $P < 0.01$ ) in soils collected from Gabal El-Nagar compared to those collected from Kahk Qibliyyah. Co and Mn concentrations revealed a significant increase ( $P < 0.05$ ) in soils collected from Kahk Qibliyyah than those collected from Gabal El-Nagar (Table 6).

Non-essential heavy metals [Pb & Cr] collected from Kahk Qibliyyah showed a highly significant increase ( $P < 0.001$ ) than those in soils collected from Gabal El-Nagar except Sr which was significantly higher in Gabal El-Nagar [ $0.708 \pm 0.135$ ] than in Kahk Qibliyyah [ $0.698 \pm 0.082$ ] ( $P < 0.001$ ). B concentration recorded a highly significant increase ( $P < 0.01$ ) in soils collected from Gabal El-Nagar compared to those collected from Kahk Qibliyyah, while Cd concentration showed that a highly significant increase ( $P < 0.01$ ) in soils collected from Kahk Qibliyyah compared to those collected from Gabal El-Nagar. Ni concentration revealed a significant increase ( $P < 0.05$ ) in soils collected from Kahk Qibliyyah than those in soils collected from Gabal El-Nagar. Al concentration was higher in Gabal El-Nagar than in Kahk Qibliyyah and showed insignificant difference (Table 7).

The Saw-scaled viper, *Echis pyramidum* bioaccumulated a very highly significant concentrations ( $P < 0.001$ ) of some essential heavy metals (Mg, Zn and Mn) in their studied tissues (liver, kidney and muscle) than in the Kenyan sand boa, *Eryx colubrinus*. Fe was bioaccumulated in the Kenyan sand boa, *Eryx colubrinus* in very highly significant concentrations in liver ( $P < 0.001$ ), and highly significant concentrations in kidney ( $P < 0.01$ ), and it was higher in muscle with insignificant difference compared to the saw-scaled viper, *Echis pyramidum*. While Mo was highly significant bioaccumulated ( $P < 0.01$ ) in liver and kidney tissues of the Kenyan sand boa, *Eryx colubrinus*, it revealed a significant increase ( $P < 0.05$ ) in muscle of the Kenyan sand boa, *Eryx colubrinus* than in the saw-scaled viper, *Echis pyramidum*. The bioaccumulation of Ca in liver tissue showed a very highly significant increase ( $P < 0.001$ ) in the Kenyan sand boa, *Eryx colubrinus* than in the saw-scaled viper, *Echis pyramidum*, while kidney and muscle tissues of the saw-scaled viper, *Echis pyramidum* recorded a very highly significant increase ( $P < 0.001$ ) than in the Kenyan sand boa, *Eryx colubrinus*. The bioaccumulation of Cu in kidney and muscle tissues of the Kenyan sand boa, *Eryx colubrinus* were very highly significant increase ( $P < 0.001$ ) and highly significant increase ( $P < 0.01$ ) respectively but it recorded a very highly significant increase ( $P < 0.001$ ) in liver of the saw-scaled viper, *Echis pyramidum* than in the Kenyan sand boa, *Eryx colubrinus*. Co was bioaccumulated in liver and kidney tissue of the Kenyan sand boa, *Eryx colubrinus* than in the saw-scaled viper, *Echis pyramidum* with very highly significant difference ( $P < 0.001$ ) while in muscle tissues, Co was detected only in the Kenyan sand boa, *Eryx colubrinus* (Table 8).

The present data showed that the saw-scaled viper, *Echis pyramidum* bioaccumulated a very highly significant concentrations ( $P < 0.001$ ) of Sr in the selected tissues (liver, kidney and muscle) than in the Kenyan sand boa, *Eryx colubrinus*. The bioaccumulation of Cd in liver and kidney showed a very highly significant concentrations ( $P < 0.001$ ) in the Kenyan sand boa, *Eryx colubrinus* than in the saw-scaled viper, *Echis pyramidum* while muscle recorded a very highly significant concentrations ( $P < 0.001$ ) in the saw-scaled viper, *Echis pyramidum* than in the Kenyan sand boa, *Eryx colubrinus*. Cr bioaccumulated a very highly significantly concentrations ( $P < 0.001$ ) in kidney and muscle of the Kenyan sand boa, *Eryx colubrinus* while liver of the saw-scaled viper, *Echis pyramidum* revealed a very highly significantly concentrations ( $P < 0.001$ ) than the saw-scaled viper, *Echis pyramidum*. Al was very highly significantly bioaccumulated ( $P < 0.001$ ) in liver and muscle of the saw-scaled viper, *Echis pyramidum* and a highly significant concentration ( $P < 0.01$ ) was recorded in kidney of the saw-scaled viper, *Echis pyramidum* than in the Kenyan sand boa, *Eryx colubrinus*. B bioaccumulated a very highly significantly concentrations ( $P < 0.001$ ) and highly significant concentrations

( $P < 0.01$ ) in [liver and muscle] and kidney respectively of the Kenyan sand boa, *Eryx colubrinus* than in the saw-scaled viper, *Echis pyramidum*. Ni recorded a very highly significant concentrations ( $P < 0.001$ ) and significant concentrations ( $P < 0.05$ ) in liver and [kidney and muscle] respectively of the saw-scaled viper, *Echis pyramidum* than in the Kenyan sand boa, *Eryx colubrinus*. Pb bioaccumulated in kidney of the saw-scaled viper, *Echis pyramidum* with a very highly significant concentrations ( $P < 0.001$ ), it revealed a significant increase ( $P < 0.05$ ) in liver and muscle of the Kenyan sand boa, *Eryx colubrinus* and the saw-scaled viper, *Echis pyramidum* respectively (Table 9).

Bioaccumulation factor in Gabal El- Nagar was higher than in Kahk Qibliyyah except Mg and Mo, bioaccumulation factor of Co in muscle in Gabal El-Nagar was not detected (Table 10).

Bioaccumulation factor of non-essential heavy metals in Gabal El- Nagar was higher than in Kahk Qibliyyah except B and Al (Table 11).

Section of liver of the saw-scaled viper, *Echis pyramidum* showed congestion in central vein with intracytoplasmic vacuolization of hepatocyte (Fig 3 A), and it also showed congestion in the portal vein surrounded by fibers and blood sinusoids that considered a sign of fibrosis (Fig 3 B).

Section of liver of the Kenyan sand boa, *Eryx colubrinus* showed severe dilations of central vein surrounded by fibers with severe degeneration in hepatocytes in the surrounding area (Fig 4 A), it showed focal aggregation of melanin-pigmented cells in the hepatic parenchyma (Fig 4 B), and Fig. 4 C was a magnification of Fig. 4 B.

Section of kidney of the saw-scaled viper, *Echis pyramidum* showed hypertrophy and vacuolization in the lining epithelium of distal convoluted tubules (Fig 5 A), it showed focal extravasation of red blood cells between degenerated distal convoluted tubules (Fig 5 B), it also showed hyalinization in the connective tissue stroma between the degenerated distal convoluted tubules (Fig 5 C).

Section of kidney of the Kenyan sand boa, *Eryx colubrinus* showed hypertrophy and vacuolization in the lining epithelium of distal convoluted tubules (Fig 6 A), it showed course granular eosinophilic cytoplasm in the tubular lining epithelium of distal convoluted tubules (Fig 6 B), Fig 6 C was the magnification of Fig 6 B to identify the granular eosinophilic cytoplasm of the lining epithelium of distal convoluted tubules, it also showed pyknosis deep bluish nuclei with deep eosinophilic cytoplasm of some lining tubular epithelium and distal convoluted tubules (Fig 6 D).

Testes of the saw-scaled viper, *Echis pyramidum* showed degeneration in the seminiferous tubules and vacuolization in all the stages of sperm formation associated with the loss of spermiogenesis (Fig 7 A), Fig 7 B was magnification of Fig 7 A and Fig 7 C was magnification of Fig 7 B.

Testes of the Kenyan sand boa, *Eryx colubrinus* showed degeneration of some seminiferous tubules (Fig 8 A), Fig 8 B was a magnification of Fig 8 A, and Fig 8 C was a magnification of Fig 8 B.

Table (1): Morphometric measurements (mm) of the saw-scaled viper, *Echis pyramidum* and the Kenyan sand boa, *Eryx colubrinus* inhabiting El-Faiyum desert, Egypt.

| Parameters \ Species           | <i>Echis pyramidum</i>                    | <i>Eryx colubrinus</i>                  |
|--------------------------------|-------------------------------------------|-----------------------------------------|
| <b>Total body length (TBL)</b> | <b>569.01±20.88</b><br><b>(459.1-645)</b> | <b>441.75±41.70</b><br><b>(285-630)</b> |
| <b>Tail length (TL)</b>        | <b>53.00±5.15</b><br><b>(35-75)</b>       | <b>32.25±2.62</b><br><b>(20-40)</b>     |
| <b>Head length (HL)</b>        | <b>31.44±2.86</b><br><b>(21.5-40)</b>     | <b>23.38±2.80</b><br><b>(10-35)</b>     |
| <b>Snout-vent length (SVL)</b> | <b>516.01±18.27</b><br><b>(414.1-570)</b> | <b>409.50±39.55</b><br><b>(265-590)</b> |

Table (2): Changes in body weight, liver, gonad, kidney and heart weight (g); hepato-somatic index (HSI) and gonado-somatic index (GSI) between saw-scaled viper, *Echis pyramidum* and Kenyan sand boa, *Eryx colubrinus* inhabiting El-Faiyum, Egypt.

| Parameters \ Species                                | <i>Echis pyramidum</i> | <i>Eryx colubrinus</i> | <i>t-values</i> |
|-----------------------------------------------------|------------------------|------------------------|-----------------|
| <b>Body weight (g)</b>                              | <b>94.11±3.24</b>      | <b>86.91±26.80</b>     | <b>6.91***</b>  |
| <b>Liver weight (g)</b>                             | <b>4.48±0.47</b>       | <b>1.80±0.35</b>       | <b>7.03***</b>  |
| <b>Hepato-somatic index (HSI) × 10<sup>-4</sup></b> | <b>52.78±2.09</b>      | <b>28.13±4.95</b>      | <b>9.85***</b>  |
| <b>Gonad weight (g)</b>                             | <b>1.42±0.33</b>       | <b>1.33±0.45</b>       | <b>5.09***</b>  |
| <b>Gonado-somatic index (GSI) × 10<sup>-5</sup></b> | <b>4.68±0.51</b>       | <b>1.53±0.38</b>       | <b>4.25***</b>  |
| <b>Kidney weight (g)</b>                            | <b>1.49±0.10</b>       | <b>0.69±0.11</b>       | <b>8.62***</b>  |
| <b>Heart weight (g)</b>                             | <b>0.71±0.06</b>       | <b>0.33±0.06</b>       | <b>8.22***</b>  |

Data are represented as means of eight (8) samples ± S.E.

*t-values* = Student *t-test* between *Echis pyramidum* and *Eryx colubrinus* for each studied parameter.

\*\*\* Very highly significant difference at (P < 0.001).

Table (3): Blood parameters of saw-scaled viper, *Echis pyramidum* and Kenyan sand boa, *Eryx colubrinus* inhabiting El-Faiyum desert, Egypt.

| Species<br>Parameters                   | <i>Echis pyramidum</i> | <i>Eryx colubrinus</i> | <i>t-values</i> |
|-----------------------------------------|------------------------|------------------------|-----------------|
| RBCs ( $\times 10^6$ /mm <sup>3</sup> ) | 1.43±0.14              | 0.69±0.14              | 7.82***         |
| Hb (g/100 ml)                           | 33.61±4.55             | 7.27±1.07              | 5.01***         |
| PCV (%)                                 | 28.26±1.13             | 27.88±5.14             | 11.04***        |

Data are represented as means of eight samples  $\pm$  S.E.

*t-values* = Student *t-test* between *Echis pyramidum* & *Eryx colubrinus* for each estimated blood parameters.

\*\*\* Very highly significant difference (P < 0.001)

Table (4): Calculated blood indices of saw-scaled viper, *Echis pyramidum* and Kenyan sand boa, *Eryx colubrinus* inhabiting El-Faiyum desert, Egypt.

| Species<br>Parameters           | <i>Echis pyramidum</i> | <i>Eryx colubrinus</i> | <i>t-values</i> |
|---------------------------------|------------------------|------------------------|-----------------|
| MCV ( $\times 10^{-4}$ fl)      | 6.79±0.72              | 4.79±0.58              | 11.22***        |
| MCH ( $\times 10^{-4}$ pg/cell) | 6.18±0.52              | 3.66±0.99              | 7.79***         |
| MCHC (g/100 ml)                 | 44.20±2.57             | 34.46±8.62             | 8.69***         |

Data are represented as means of eight samples  $\pm$  S.E.

*t-values* = Student *t-test* between *Echis pyramidum* & *Eryx colubrinus* for each estimated blood parameters.

\*\*\* Very highly significant difference (P < 0.001).



Table (5): Changes in plasma glucose, total lipids and total protein of saw-scaled viper, *Echis pyramidum* and Kenyan sand boa, *Eryx colubrinus* inhabiting El-Faiyum desert, Egypt.

| <b>Species</b>                  | <b><i>Echis pyramidum</i></b> | <b><i>Eryx colubrinus</i></b> | <b><i>t-values</i></b> |
|---------------------------------|-------------------------------|-------------------------------|------------------------|
| <b>Parameters</b>               |                               |                               |                        |
| <b>Glucose (mg/100 ml)</b>      | <b>89.91±1.75</b>             | <b>56.60±14.32</b>            | <b>8.95***</b>         |
| <b>Total lipids (mg/100 ml)</b> | <b>7293.75±424.18</b>         | <b>1263.15±363.57</b>         | <b>5.19***</b>         |
| <b>Total protein (g/100 ml)</b> | <b>6.36±0.22</b>              | <b>3.26±0.68</b>              | <b>9.07***</b>         |

Data are represented as means of eight samples ± S.E.

*t-values* = Student *t-test* between *Echis pyramidum* & *Eryx colubrinus* for each estimated blood parameters.

\*\*\* Very highly significant difference ( $P < 0.001$ )

Table (6): Concentration of essential heavy metals (ppm) in the available soils collected from Gabal El-Nagar and Kahk Qibliyyah in El-Faiyum desert, Egypt.

| Soil samples    | El-Faiyum Desert                  |                                  | <i>t</i> -values |
|-----------------|-----------------------------------|----------------------------------|------------------|
|                 | <i>Site I</i><br>Gabal El-Nagar   | <i>Site II</i><br>Kahk Qibliyyah |                  |
| Calcium (Ca)    | 39.418±7.047<br>(9.11-58.68)      | 52.547±5.342<br>(35.98-63.7)     | 9.873***         |
| Magnesium (Mg)  | 650.115±269.496<br>(62.66-1913.6) | 509.267±57.606<br>(328.6-619.8)  | 4.356**          |
| Iron (Fe)       | 9.333±2.702<br>(1.817-21.24)      | 21.747±2.868<br>(15.928-30.68)   | 5.861***         |
| Copper (Cu)     | 1.582±0.375<br>(0.486-3.262)      | 5.137±0.475<br>(3.68-6.176)      | 5.521***         |
| Zinc (Zn)       | 5.043±0.482<br>(3.756-6.958)      | 6.292±0.66<br>(4.682-8.248)      | 13.093***        |
| Cobalt (Co)     | 0.159±0.02<br>(0.066-0.205)       | 0.733±0.132<br>(0.347-1.064)     | 4.149*           |
| Molybdenum (Mo) | 0.085±0.005<br>(0.067-0.094)      | 0.038±0.009<br>(0.016-0.067)     | 6.919***         |
| Manganese (Mn)  | 10.101±2.44<br>(4.956-21.3)       | 68.593±12.092<br>(40.4-105.06)   | 3.712*           |

Data are represented as means of six samples ± S.E. Lower and upper values between parentheses.

*t*-values = Student *t*-test between the studied sites in El-Faiyum desert for each estimated heavy metal.

\* Significant difference (P < 0.05), \*\* Highly significant difference (P < 0.01), \*\*\* Very highly significant difference (P < 0.001).

Table (7): Concentration of non-essential heavy metals (ppm) in the available soils collected from Gabal El-Nagar and Kahk Qibliyyah in El-Faiyum desert, Egypt.

| Species               | El-Faiyum Desert                           |                                            | <i>t</i> -values |
|-----------------------|--------------------------------------------|--------------------------------------------|------------------|
|                       | <i>Site I</i><br>Gabal El-Nagar            | <i>Site II</i><br>Kahk Qibliyyah           |                  |
| <b>Heavy metals</b>   |                                            |                                            |                  |
| <b>Boron (B)</b>      | <b>2.571±0.774</b><br><b>(0.749-6.06)</b>  | <b>1.616±0.51</b><br><b>(0.559-3.2)</b>    | <b>4.505**</b>   |
| <b>Aluminium (Al)</b> | <b>1.431±0.505</b><br><b>(0.048-2.814)</b> | <b>0.058±0.003</b><br><b>(0.048-0.064)</b> | <b>2.345</b>     |
| <b>Strontium (Sr)</b> | <b>0.708±0.135</b><br><b>(0.266-1.129)</b> | <b>0.698±0.082</b><br><b>(0.485-0.932)</b> | <b>9.347***</b>  |
| <b>Lead (Pb)</b>      | <b>0.223±0.048</b><br><b>(0.048-0.383)</b> | <b>0.824±0.04</b><br><b>(0.696-0.893)</b>  | <b>5.485***</b>  |
| <b>Nickel (Ni)</b>    | <b>0.186±0.05</b><br><b>(0.027-0.384)</b>  | <b>0.836±0.16</b><br><b>(0.452-1.313)</b>  | <b>4.042*</b>    |
| <b>Cadmium (Cd)</b>   | <b>0.031±0.006</b><br><b>(0.015-0.049)</b> | <b>0.053±0.016</b><br><b>(0.028-0.104)</b> | <b>4.809**</b>   |
| <b>Chromium (Cr)</b>  | <b>0.05±0.004</b><br><b>(0.043-0.07)</b>   | <b>0.064±0.004</b><br><b>(0.05-0.071)</b>  | <b>16.08***</b>  |

Data are represented as means of six samples ± S.E. Lower and upper values between parentheses.

*t*-values = Student *t*-test between the studied sites in El-Faiyum desert for each estimated heavy metal.

\* Significant difference ( $P < 0.05$ ), \*\* Highly significant difference ( $P < 0.01$ ), \*\*\* Very highly significant difference ( $P < 0.001$ ).

Table (8): Bioaccumulation of essential heavy metals (Ca, Mg, Cu, Fe, Zn, Co, Mo and Mn) in liver, kidney and muscle (ppm) of saw-scaled viper, *Echis pyramidum* (*E. p.*) and Kenyan sand boa, *Eryx colubrinus* (*E. c.*) inhabiting El-Faiyum desert, Egypt.

| Tissues               | Liver                   |                         |                  | Kidney                  |                         |                  | Muscle                  |                         |                  |
|-----------------------|-------------------------|-------------------------|------------------|-------------------------|-------------------------|------------------|-------------------------|-------------------------|------------------|
|                       | <i>E. p.</i>            | <i>E. c.</i>            | <i>t-values</i>  | <i>E. p.</i>            | <i>E. c.</i>            | <i>t-values</i>  | <i>E. p.</i>            | <i>E. c.</i>            | <i>t-values</i>  |
| <b>Heavy metals</b>   |                         |                         |                  |                         |                         |                  |                         |                         |                  |
| <b>Calcium (Ca)</b>   | <b>546.34</b><br>±39.24 | <b>556.48</b><br>±43.40 | <b>19.489***</b> | <b>571.77</b><br>±44.98 | <b>542.78</b><br>±33.47 | <b>20.382***</b> | <b>599.56</b><br>±18.31 | <b>509.55</b><br>±64.93 | <b>16.029***</b> |
| <b>Magnesium (Mg)</b> | <b>249.23</b><br>±10.45 | <b>240.20</b><br>±15.29 | <b>27.123***</b> | <b>294.68</b><br>±26.58 | <b>257.31</b><br>±6.33  | <b>19.64***</b>  | <b>334.11</b><br>±10.22 | <b>240.30</b><br>±15.22 | <b>19.141***</b> |
| <b>Iron (Fe)</b>      | <b>176.59</b><br>±16.91 | <b>178.42</b><br>±67.55 | <b>27.123***</b> | <b>128.4</b><br>±16.6   | <b>148.1</b><br>±63.71  | <b>4.333**</b>   | <b>97.56</b><br>±10.1   | <b>178.19</b><br>±92.61 | <b>2.985</b>     |
| <b>Copper (Cu)</b>    | <b>3.54</b><br>±0.32    | <b>3.36</b><br>±0.61    | <b>10.341***</b> | <b>1.77</b><br>±0.17    | <b>2.62</b><br>±0.49    | <b>7.951***</b>  | <b>0.8</b><br>±0.06     | <b>2.7</b><br>±0.67     | <b>4.274**</b>   |

Data are represented as means of eight samples ± S.E.

*t-values* = Student t-test between *Echis pyramidum* and *Eryx colubrinus* in some selected organs for each estimated heavy metal.

\* Significant difference (P < 0.05), \*\* Highly significant difference (P < 0.01),

\*\*\* Very highly significant difference (P < 0.001).

Table (8): continued

| Tissues                    | Liver                        |                              |                  | Kidney                       |                              |                  | Muscle                      |                              |                 |
|----------------------------|------------------------------|------------------------------|------------------|------------------------------|------------------------------|------------------|-----------------------------|------------------------------|-----------------|
|                            | <i>E. p.</i>                 | <i>E. c.</i>                 | <i>t-values</i>  | <i>E. p.</i>                 | <i>E. c.</i>                 | <i>t-values</i>  | <i>E. p.</i>                | <i>E. c.</i>                 | <i>t-values</i> |
| <b>Heavy metals</b>        |                              |                              |                  |                              |                              |                  |                             |                              |                 |
| <b>Zinc<br/>(Zn)</b>       | <b>26.55</b><br><b>±1.45</b> | <b>20.61</b><br><b>±6.71</b> | <b>6.923***</b>  | <b>25.99</b><br><b>±2.66</b> | <b>14.41</b><br><b>±4.78</b> | <b>6.653***</b>  | <b>59.9</b><br><b>±3.69</b> | <b>18.49</b><br><b>±7.29</b> | <b>5.898***</b> |
| <b>Cobalt<br/>(Co)</b>     | <b>0.11</b><br><b>±0.03</b>  | <b>0.22</b><br><b>±0.18</b>  | <b>9.639***</b>  | <b>0.11</b><br><b>±0.01</b>  | <b>0.15</b><br><b>±0.01</b>  | <b>11.476***</b> | –                           | <b>0.11</b><br><b>±0.02</b>  | –               |
| <b>Molybdenum<br/>(Mo)</b> | <b>0.48</b><br><b>±0.04</b>  | <b>1.69</b><br><b>±0.52</b>  | <b>3.663**</b>   | <b>0.19</b><br><b>±0.01</b>  | <b>0.53</b><br><b>±0.15</b>  | <b>4.220**</b>   | <b>0.12</b><br><b>±0.01</b> | <b>1.08</b><br><b>±0.27</b>  | <b>3.317*</b>   |
| <b>Manganese<br/>(Mn)</b>  | <b>3.08</b><br><b>±0.106</b> | <b>2.87</b><br><b>±0.35</b>  | <b>13.204***</b> | <b>3.19</b><br><b>±0.18</b>  | <b>2.93</b><br><b>±0.43</b>  | <b>31.632***</b> | <b>3.54</b><br><b>±0.34</b> | <b>2.16</b><br><b>±0.42</b>  | <b>9.03***</b>  |

Data are represented as means of eight samples  $\pm$  S.E , *t-values* = Student *t-test* between *Echis pyramidum* and *Eryx colubrinus* in some selected organs for each estimated heavy metal. \* Significant difference ( $P < 0.05$ ), \*\* Highly significant difference ( $P < 0.01$ ), \*\*\* Very highly significant difference ( $P < 0.001$ ).

Table (9): Bioaccumulation of non-essential heavy metals (B, Al, Sr, Pb, Ni, Cd and Cr) in liver, kidney and muscle (ppm) of saw-scaled viper, *Echis pyramidum* (*E. p.*) and Kenyan sand boa, *Eryx colubrinus* (*E. c.*) inhabiting El-Faiyum, Egypt.

| Tissues<br>Heavy metals | Liver                  |                       |                 | Kidney                 |                             |                 | Muscle                 |                       |                 |
|-------------------------|------------------------|-----------------------|-----------------|------------------------|-----------------------------|-----------------|------------------------|-----------------------|-----------------|
|                         | <i>E. p.</i>           | <i>E. c.</i>          | <i>t-values</i> | <i>E. p.</i>           | <i>E. c.</i>                | <i>t-values</i> | <i>E. p.</i>           | <i>E. c.</i>          | <i>t-values</i> |
| <b>Boron (B)</b>        | <b>8.77</b><br>±0.24   | <b>19.19</b><br>±3.58 | <b>6.372***</b> | <b>17.08</b><br>±3.11  | <b>22.83</b><br>±15.55      | <b>2.592*</b>   | <b>5.49</b><br>±0.23   | <b>10.72</b><br>±2.84 | <b>5.282***</b> |
| <b>Aluminium (Al)</b>   | <b>108.75</b><br>±8.34 | <b>48.06</b><br>±9.00 | <b>7.98***</b>  | <b>72.03</b><br>±21.18 | <b>62.90</b><br>±26.24      | <b>4.132**</b>  | <b>132.8</b><br>±17.94 | <b>44.25</b><br>±9.87 | <b>5.856***</b> |
| <b>Strontium (Sr)</b>   | <b>2.22</b><br>±0.13   | <b>0.96</b><br>±0.35  | <b>6.567***</b> | <b>2.26</b><br>±0.2    | <b>1.03</b><br>±0.32        | <b>6.839***</b> | <b>2.08</b><br>±0.81   | <b>1.11</b><br>±0.36  | <b>7.358***</b> |
| <b>Lead (Pb)</b>        | <b>0.69</b><br>±0.082  | <b>2.04</b><br>±0.63  | <b>3.871*</b>   | <b>2.01</b><br>±0.501  | <b>0.95±</b><br><b>0.28</b> | <b>4.768***</b> | <b>7.81</b><br>±3.85   | <b>0.70</b><br>±0.12  | <b>2.047*</b>   |

Data are represented as means of eight samples ± S.E.

*t-values* = Student *t-test* between *Echis pyramidum* and *Eryx colubrinus* in some selected organs for each estimated heavy metal.

\* Significant difference (P < 0.05), \*\* Highly significant difference (P < 0.01), \*\*\* Very highly significant difference (P < 0.001).

Table (9): Continued

| Tissues<br>Heavy Metals | Liver         |               |                 | Kidney        |               |                 | Muscle        |               |                 |
|-------------------------|---------------|---------------|-----------------|---------------|---------------|-----------------|---------------|---------------|-----------------|
|                         | <i>E. p.</i>  | <i>E. c.</i>  | <i>t-values</i> | <i>E. p.</i>  | <i>E. c.</i>  | <i>t-values</i> | <i>E. p.</i>  | <i>E. c.</i>  | <i>t-values</i> |
| Nickel (Ni)             | 1.70<br>±0.48 | 1.13<br>±0.41 | 4.525***        | 6.93<br>±1.72 | 1.51<br>±0.71 | 3.7*            | 3.16<br>±1.06 | 1.13<br>±0.41 | 3.52*           |
| Cadmium (Cd)            | 0.11<br>±0.01 | 0.13<br>±0.02 | 12.778***       | 0.10<br>±0.01 | 0.12<br>±0.01 | 15.951***       | 0.11<br>±0.01 | 0.10<br>±0.01 | 18.085***       |
| Chromium (Cr)           | 3.91<br>±0.31 | 2.54<br>±0.15 | 13.239***       | 1.68<br>±0.18 | 1.89<br>±0.22 | 12.556***       | 1.99<br>±0.33 | 2.49<br>±0.18 | 11.677***       |

Data are represented as means of eight samples ± S.E.

*t-values* = Student *t-test* between *Echis pyramidum* and *Eryx colubrinus* in some selected organs for each estimated heavy metal.

\* Significant difference ( $P < 0.05$ ), \*\*\* Very highly significant difference ( $P < 0.001$ ).

Table (10): Bioaccumulation factors of essential heavy metals.

| Tissues            | <i>Echis pyramidum (E. p.)</i><br>Gabal El-Nagar (G) |        |        | <i>Eryx colubrinus (E. c.)</i><br>Kahk Qibliyyah (K) |        |        |
|--------------------|------------------------------------------------------|--------|--------|------------------------------------------------------|--------|--------|
|                    | Liver                                                | Kidney | Muscle | Liver                                                | Kidney | Muscle |
| Heavy metals       |                                                      |        |        |                                                      |        |        |
| Calcium<br>(Ca)    | 13.86                                                | 14.505 | 15.212 | 10.59                                                | 10.33  | 9.697  |
| Magnesium<br>(Mg)  | 0.383                                                | 0.453  | 0.514  | 0.472                                                | 0.505  | 0.472  |
| Iron<br>(Fe)       | 18.92                                                | 13.757 | 10.453 | 8.204                                                | 6.81   | 8.194  |
| Copper<br>(Cu)     | 2.237                                                | 1.119  | 0.506  | 0.654                                                | 0.5    | 0.526  |
| Zinc<br>(Zn)       | 5.265                                                | 5.154  | 11.879 | 3.275                                                | 2.289  | 2.938  |
| Cobalt<br>(Co)     | 0.692                                                | 0.692  |        | 0.3                                                  | 0.205  | 0.15   |
| Molybdenum<br>(Mo) | 5.667                                                | 2.243  | 1.417  | 44.828                                               | 14.058 | 28.647 |
| Manganese<br>(Mn)  | 0.305                                                | 0.316  | 0.35   | 0.042                                                | 0.043  | 0.031  |



Table (11): Bioaccumulation factors of non-essential heavy metals

| Heavy Metals \ Tissues | <i>Echis pyramidum (E. p.)</i><br>Gabal El-Nagar (G) |        |        | <i>Eryx colubrinus (E. c.)</i><br>Kahk Qibliyyah (K) |          |         |
|------------------------|------------------------------------------------------|--------|--------|------------------------------------------------------|----------|---------|
|                        | Liver                                                | Kidney | Muscle | Liver                                                | Kidney   | Muscle  |
| Boron (B)              | 3.411                                                | 6.643  | 2.135  | 11.875                                               | 14.127   | 6.634   |
| Aluminium (Al)         | 76.001                                               | 50.339 | 92.809 | 824.357                                              | 1078.902 | 759.005 |
| Strontium (Sr)         | 3.134                                                | 3.191  | 2.937  | 1.376                                                | 1.477    | 1.591   |
| Lead (Pb)              | 3.096                                                | 9.017  | 35.038 | 2.477                                                | 1.153    | 0.85    |
| Nickel (Ni)            | 9.15                                                 | 37.298 | 17.008 | 1.351                                                | 1.806    | 1.351   |
| Cadmium (Cd)           | 3.537                                                | 3.215  | 3.537  | 2.434                                                | 2.247    | 1.873   |
| Chromium (Cr)          | 77.734                                               | 33.4   | 39.563 | 40                                                   | 29.764   | 39.213  |

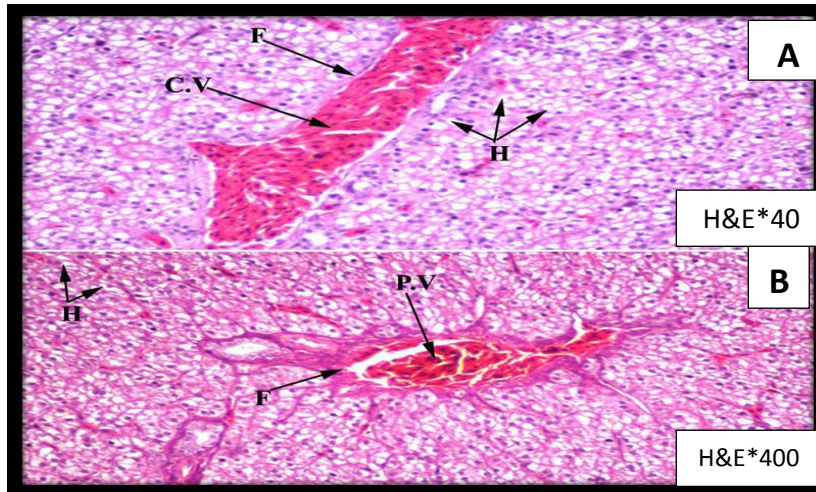

Fig .6. Photomicrograph shows section of liver of saw-scaled viper, *Echis pyramidum*.

C.V: Central vein F: Fibers H: Hepatocytes P.V: Portal

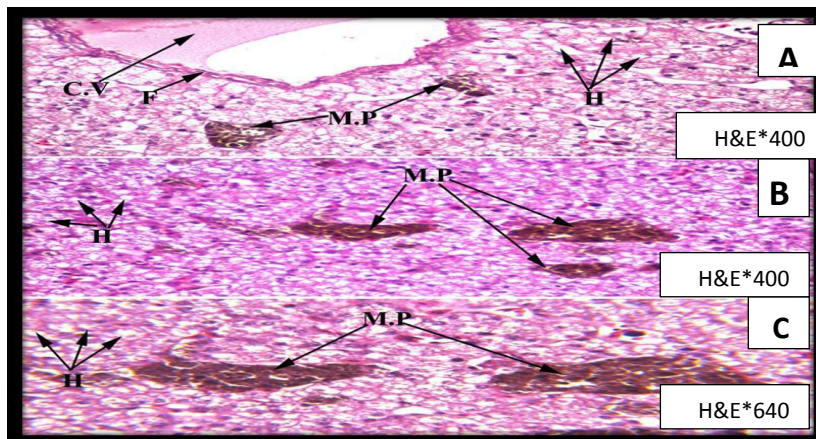

Fig .7. Photomicrograph shows section of liver of Kenyan sand boa, *Eryx colubrinus*.

C.V: Central vein F: Fibers H: Hepatocytes M.P: Melanin

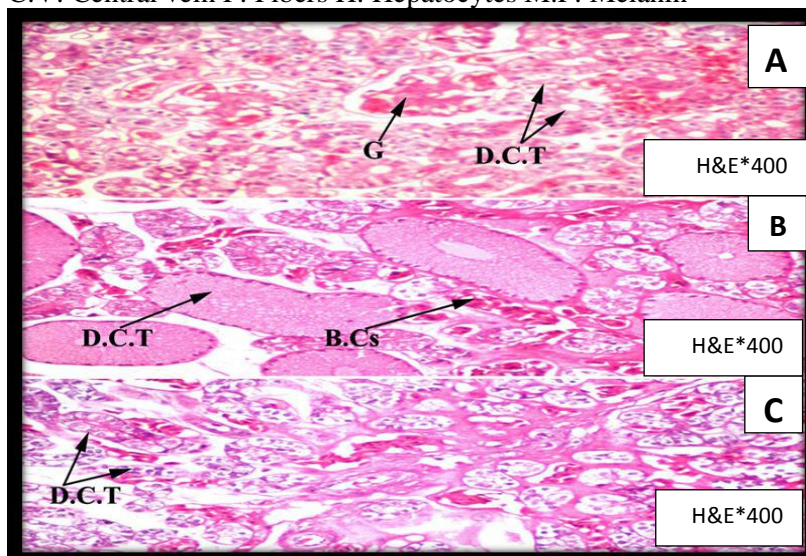

Fig .8. Photomicrograph shows section of kidney of saw-scaled viper, *Echis pyramidum*.

G: Glomerulus D.C.T: Distal convoluted tubule B.Cs: Blood cells

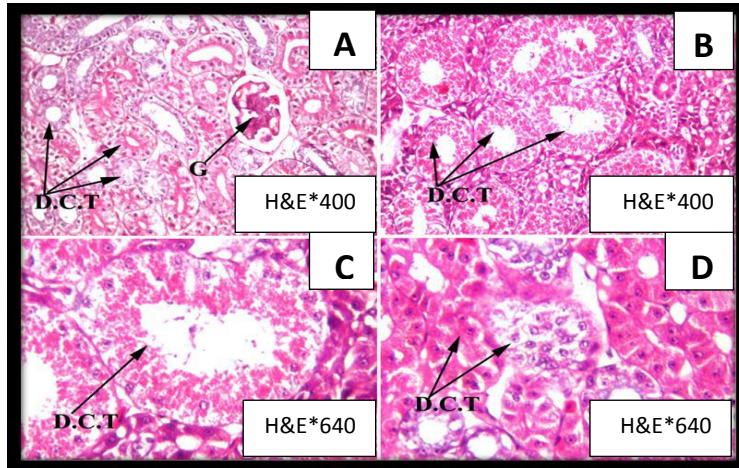

Fig .9. Photomicrograph shows section of kidney of Kenyan sand boa, *Eryx colubrinus*.

G: Glomerulus D.C.T: Distal convoluted tubules

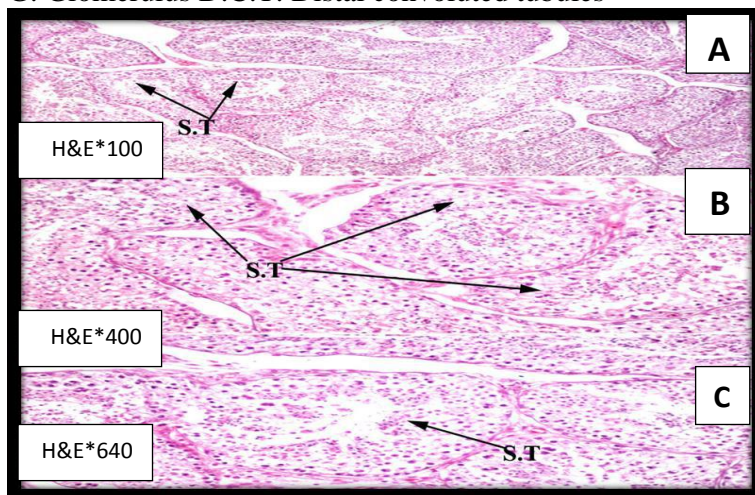

Fig .10. Photomicrograph shows section of testes of saw-scaled viper, *Echis pyramidum*.

S.T: Seminiferous tubule

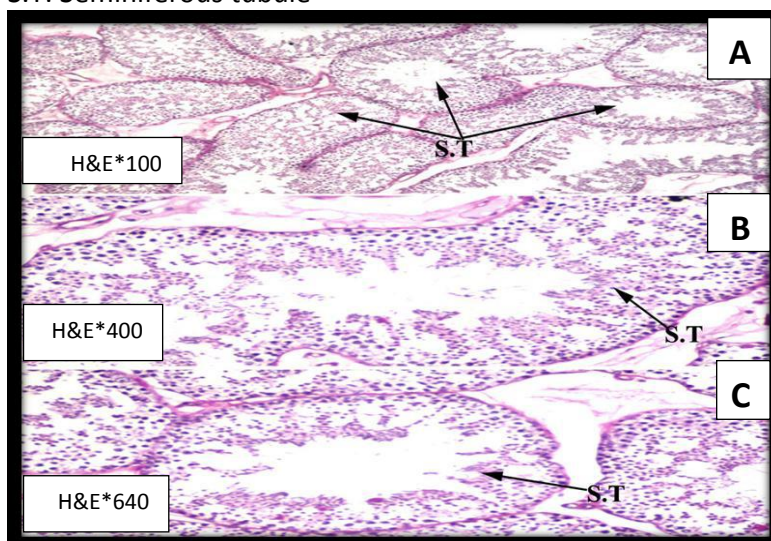

Fig .11. Photomicrograph shows section of testes of Kenyan sand boa, *Eryx colubrinus*.

S.T: Seminiferous tubules

## Discussion:

Saw-scaled viper, *Echis pyramidum* is a medium sized snake, with a short, stocky body (El Din, 2006). Kenyan sand boa, *Eryx colubrinus* is short and thick snake (Flower, 1933).

The results of the present study indicated an individual variation between the saw-scaled viper, *Echis pyramidum* and the Kenyan sand boa, *Eryx colubrinus* and showed that all the morphometric measurements were higher in the saw-scaled viper, *Echis pyramidum* than in the Kenyan sand boa, *Eryx colubrinus*.

Body weight and diet have influence on the accumulation of metals in snakes (Drewett *et al.*, 2013). Diet is considered the significant route of exposure for the snakes (Burger *et al.*, 2005). Many contaminant studies have reported growth-related changes in metal concentrations in the whole bodies and different tissues of snakes (Hopkins *et al.*, 1999; Burger *et al.*, 2005; Albrecht *et al.*, 2007 and Rezaie-Atagholipour *et al.*, 2012). Growth related changes (body weight, organ weight, hepatosomatic index and gonadosomatic index) in heavy metal concentrations require further investigation in snakes (Hopkins *et al.*, 2005).

Results of the present investigation showed a significant increase in the body weight, liver weight, hepatosomatic index, gonads weight, gonadosomatic index, kidney weight and heart weight of the saw-scaled viper, *Echis pyramidum* and significant decrease in the body weight, liver weight, hepatosomatic index, gonad weight, gonadosomatic index, kidney weight and heart weight of the Kenyan sand boa, *Eryx colubrinus*.

Results of the increase in body weight of the saw-scaled viper agreed with Hopkins *et al.* (1999) and Rezaie-Atagholipour *et al.* (2012) while decrease of the body weight of the Kenyan sand boa agreed with Burger *et al.* (2005) and Albrecht *et al.* (2007). Hopkins *et al.* (1999) and Rezaie-Atagholipour *et al.* (2012) found that the increase in the body weight of snakes contaminated with heavy metals was due to bioaccumulation throughout growth.

Burger *et al.* (2005) and Albrecht *et al.* (2007) suggested that the decrease in the body weight of snakes contaminated with heavy metals was due to homeostatic control.

Hematology and plasma biochemistry of snakes are considered as useful tools to evaluate the health conditions of individuals especially the adverse effects that are associated with pollution as a result of the exposure to environmental contaminants (Wilkinson, 2003; Hidalgo-Vila *et al.*, 2007 and Kadry, 2011). However, there are no established baseline measurements for a wide variety of blood and plasma biochemical parameters in snakes that can be used as reference values to describe a specific physiological condition (Gavric *et al.*, 2015). Identification of accumulated heavy metals in snakes' tissues provides a measure of the extent of pollutant exposure experienced by organisms but fails to provide insight into the biological significance of exposure to pollutants; therefore, the demand of examining the physiology and/or ecology of snakes in conjunction with tissue concentration of environmental contaminants has been increased (Hopkins *et al.*, 1999).

Results of the present study showed that a significant increase in the blood parameters and calculated blood indices of the saw-scaled viper, *Echis pyramidum* while there is a significant decrease in the blood parameters and calculated blood indices of the Kenyan sand boa, *Eryx colubrinus*.

Results of Tosunoglu *et al.* (2011) showed that the venomous snakes exhibited a significant increase in the blood parameters and calculated blood indices, while non-

venomous snakes exhibited a significant decrease in the blood parameters and calculated blood indices, and this finding agreed with the present investigation.

The variations in the blood parameters and calculated blood indices could be explained by not only the differences of the normal behavior of each species but also, food and activities of each species (**Vasaruchapong et al., 2013 and Ozzetti et al., 2015**) and they are considered as a useful tool in demonstrating the physiology of snakes after exposure to environmental contaminants (**Wack et al., 2012**). The difference in blood parameters among species was due to some physiological factors such as sex, age, pregnancy, physical exercise, weather, stress, altitude, captivity and diet (**Alleman et al., 1999; Martínez et al., 2004; Parida et al., 2014 and Gómez et al., 2016**).

Plasma makes up 60 to 80% of blood volume and contains a great variety of substances in reptiles like other vertebrates present in trace amounts. The concentration of reptilian plasma glucose is associated with seasonal variations. Physiological change within day, especially metabolic cycles is directly correlated with the level of blood glucose in reptiles (**Dessauer, 1970 and Chandavar and Naik, 2004**). Plasma protein of reptiles comprises 3 to 7% of the total plasma content and it is composed of a mixture of complex protein. Total lipid content of reptilian plasma varies among species according to environmental and physiological conditions (**Dessauer, 1970; Pal et al., 2008 and Parida et al., 2014**).

Plasma glucose is an important indicator that express the physiological changes in snakes (**Coz-Rakovac et al., 2011**).

Results of the present study showed a significant increase in the saw-scaled viper, *Echis pyramidum* and a significant decrease in the Kenyan sand boa, *Eryx colubrinus*. In snakes, plasma glucose varies in response to the external environmental fluctuations and reflects their physiological changes as result of their nutrition (**Dessauer, 1970; Campbell, 2004 and Gómez et al., 2016**). However, different species exhibit different patterns in response to some environmental changes (**Coz-Rakovac et al., 2011**).

In general, lipid concentrations in snakes seem to be quite conservative and do not change markedly even during prolonged starvation (**Dessauer, 1970 and Coz-Rakovac et al., 2011**).

Results of the present study showed a significant increase in the saw-scaled viper, *Echis pyramidum* and a significant decrease in the Kenyan sand boa, *Eryx colubrinus*. Elevated plasma lipid could reflect its synthesis in the liver and circulation in blood to other parts of the body for production of fat reserves (**Coz-Rakovac et al., 2011**).

Plasma total protein in snakes is of vital importance in immune and coagulation functions, transportation of ions and hydrophobic molecules, enzymatic activity and regulation of plasma osmolality (**Dessauer, 1970 and Coz-Rakovac et al., 2011**).

Results of the present study showed a significant increase in the saw-scaled viper, *Echis pyramidum* and a significant decrease in the Kenyan sand boa, *Eryx colubrinus*. Plasma total protein is affected by nutrition (**Dessauer, 1970 and CozRakovac et al., 2011**). Alternatively, a metabolic disorder, such as insufficient fat stores, may have necessitated unusually high catabolism of protein reserves during hibernation (**Coz-Rakovac et al., 2011**).

Heavy metals are the most studied class of contaminants in toxicological reports of snakes (**Sparling et al., 2010**). **Gavrić et al. (2015)** mentioned that the position of snakes in food chain makes them very suitable for the accumulation of contaminants and biomonitoring, and also snakes play important ecological roles in controlling the flow of nutrients, energy and contaminants in food webs. Bioaccumulation of metals

have been examined in tissues of snakes (**Burger, 1992; Hopkins et al., 1999; Hopkins et al., 2001; Hopkins et al., 2002; Hopkins et al., 2004; Hopkins et al., 2005; Burger et al., 2005; Campbell et al., 2005; Rainwater et al., 2005; Burger et al., 2006; Burger et al., 2007; Wylie et al., 2009; Rezaie-Atagholipour et al., 2012; Drewett et al., 2013 and Serseshk and Bakhtiari, 2015**). Since the bioaccumulation of metals has been established, the present study focused on the soil as a media transmitting heavy metals into the snakes' tissues and the biological consequences as a result of heavy metals uptake into the snakes' tissues.

The relationships between the concentration of heavy metals in snakes and those in soil should be examined from their respective collection sites (**Rainwater et al., 2005**). In this report, the status of essential heavy metals (Ca, Mg, Fe, Cu, Zn, Co, Mo and Mn) and non-essential heavy metals (B, Al, Sr, Pb, Ni, Cd and Cr) in Gabal El-Nagar and Kahk Qibliyah in El-Faiyum, Egypt was studied and associated with the bioavailability of heavy metals in the saw-scaled viper, *Echis pyramidum* and the Kenyan sand boa, *Eryx colubrinus*. El-Faiyum's soils are alkaline in nature and rich in CaCO<sub>3</sub> (**Abd Elgawad et al., 2007**).

The results of our findings revealed that the concentrations of DTPA heavy metals in the surface of soil are variable (Table 7&8), and this agrees with **Abd Elgawad et al. (2007)** and **Abdel Kawy and Belal (2012)** who state that the surface layer of El-Faiyum's soils has been subjected to heavy metals as result of atmospheric depositions, applied commercial fertilizers (phosphates in particular), pesticides, manures, waste disposals and may be discharge of untreated domestic sewage and they also suggested that top soils of El-Faiyum have been subjected to heavy metal contaminations and this because of the fact of being close to the main roads and urban areas and also using drainage water as a source of irrigation water in El-Faiyum depression enhance the toxicity of surface soil by increasing heavy metal accumulation because drainage water has high heavy metal content as result of pollution effects, finally these factors jeopardize the health status of the surrounding biota.

There are few reports of the metal levels in terrestrial snakes (**Cocking et al., 1991 and Cristol et al., 2008**). Variation in habitat preferences (e.g., aquatic vs terrestrial) among snakes makes it possible to evaluate contaminant exposure across habitat types (**Campbell and Campbell, 2002**). This study examined the accumulation of essential heavy metals (Ca, Mg, Fe, Cu, Zn, Co, Mo and Mn) and non-essential heavy metals (B, Al, Sr, Pb, Ni, Cd and Cr) in the saw-scaled viper, *Echis pyramidum* inhabiting Gabal El-Nagar and the Kenyan sand boa, *Eryx colubrinus* inhabiting Kahk Qibliyah El-Faiyum.

**Rezaie-Atagholipour et al. (2012)** used the prey items of annulated sea snakes to prove that the fact that snakes as predators are able to bio-magnify environmental contaminants within ecosystems and they are also able to transmit contaminants into food chain because they have conversion efficiencies and can convert a large amount of ingested energy into biomass which may be associated with bio-magnification of environmental contaminants.

In this study, we investigate the relationship between the contaminant concentration in the liver, kidney and muscle tissue in the saw-scaled viper and the Kenyan sand boa and their relations with the soils from the collected sites.

The simplest explanation for the difference between our field study and the previous studies conducted by the authors in laboratories (**Hopkins et al., 1999 and Hopkins et al., 2001**) was that snakes collected from field had been exposed to heavy metals for a longer period of time and thus the chance to accumulate heavy metals would be

higher. No doubt that the levels of metals within the tissues of snakes are variable (**Burger, 1992 and Burger et al., 2007**): (1) Ca, Mg, Zn, Mn, Al and Pb were the highest in the muscle of the saw-scaled viper, *Echis pyramidum*, (2) Fe, Cu, Mo and Cr were the highest in the liver of the saw-scaled viper, *Echis pyramidum*, (3) B and Sr were the highest in the kidney of the saw-scaled viper, *Echis pyramidum*, (4) Cd was the highest in the liver and muscle of the saw-scaled viper, *Echis pyramidum*, (5) Co was the highest in the liver and kidney of the saw-scaled viper, *Echis pyramidum*, while the levels of Co in the muscle of the saw-scaled viper, *Echis pyramidum* were not detected. **Nasseem and Abdalla (2003)** observed that pasture soils of the texture of loomy sands and clays, from the North Western Coast of Egypt contain acetic acid soluble EDTA extractable Co from 3.6 to 4.69mg/Kg and it caused Co deficiency in the terrestrial animals inhabiting this soil. They stated that the main factors that cause Co deficiency in terrestrial animals were alkaline and calcareous soils and found that the soils located in the main road mainly faced dust containing polluted Co, which had an influence on the deficiency of Co in the tissues of the terrestrial animals inhabiting these sites. This interpretation was closely related to the results and properties of the soil of the collected sites, (6) Ca, Fe, Cu, Zn, Co, Mo, Pb, Cd and Cr were the highest in the liver of the Kenyan sand boa, *Eryx colubrinus*, (7) Mg, Mn, B, Al and Ni were the highest in the kidney of the Kenyan sand boa, *Eryx colubrinus*. These findings are associated with **Burger et al. (2007)** assumption that not all tissues can be used as indicator of heavy metals exposure. Since Few studies have examined the effect of metal accumulation on snakes (**Campbell and Campbell, 2001**), and data demonstrating the toxicity threshold in snakes is currently lacking (**Hopkins et al., 2005**), thus; this data in addition to **Burger et al. (2007)** data can be used to develop indicators of the relationship among tissue levels, that can be used for predicting levels in other tissues that might not be available.

The levels of the metals accumulated in the liver, kidney and muscle of the saw-scaled viper, *Echis pyramidum* and Kenyan sand boa, *Eryx colubrinus* were variable due to the biogeochemical properties of the collected sites (**Gaines et al., 2002; Lord et al., 2002; Burger et al., 2006 and Burger et al., 2007**) and the fact that the saw-scaled viper, *Echis pyramidum* belongs to venomous snakes while the Kenyan sand boa, *Eryx colubrinus* belongs to non-venomous snakes, according to this fact their ecology and habitat are different (**El Din, 2006**), consequently; their methodology of food intake are different. Saw-scaled viper, *Echis pyramidum* track their prey animals, after venom biting in a process called prey relocalization which is done via a protein in their venom (**Hayes et al., 2002**). Kenyan sand boa, *Eryx colubrinus* track their prey animals by constriction and coil themselves around their prey animals (**Stidworthy, 1974 and Mehrtens, 1987**). **Burger et al. (2007)** stated that different species of snakes are predators and exhibit exposure difference due to differences in prey composition, or to interspecific differences because of toxicodynamics.

Both Saw-scaled viper, *Echis pyramidum* and Kenyan sand boa, *Eryx colubrinus* have the same diet mainly fed on lizards and small mammals such as rodents (**Saleh, 1997**). According to **El-Din (2006)** *Eryx colubrinus* is a nocturnal snake; partly fossorial, capable of moving below soil surface and waits concealed for its prey. It moves in a distinct serpentine motion above the surface; While Saw-scaled viper, *Echis pyramidum* was found in Faiyum in deeply fissured, dry fluvial soil in the cultivated area. Since the two species of snakes are closely related in feeding behavior. It thus seems that there are interspecific differences in uptake and bioaccumulation among the species that bears examination.

Bioaccumulation factor (BAF) is used to quantify the bioaccumulation of environmental pollutants in aquatic and terrestrial biota (**Mountouris et al., 2002**), and is crucial to estimate chemical residues in biota from measured concentrations in the appropriate reference media (**Hsu et al., 2006**). Since the ecology of the saw-scaled viper, *Echis pyramidum* and the Kenyan sand boa, *Eryx colubrinus* are different, therefore; the bioaccumulation factors of metals are considered useful indices to estimate the difference between the two species (**Dai et al., 2004**).

Results of our investigation showed that BAF of Mg and Mn in the liver, kidney and muscle of the saw-scaled viper, *Echis pyramidum* and the Kenyan sand boa, *Eryx colubrinus*, BAF of Cu in the muscle of the saw-scaled viper, *Echis pyramidum*, BAF of Cu in the liver, kidney and muscle of the Kenyan sand boa, *Eryx colubrinus*, BAF of Co in the liver and kidney of the saw-scaled viper, *Echis pyramidum* and BAF of Co in the liver, kidney and muscle of the Kenyan sand boa, *Eryx colubrinus* were lower than 1, which means that El-Faiyum's soil is not contaminated with these metals. While BAF of Ca, Fe, Zn and Mo in the liver, kidney and muscle of the saw-scaled viper, *Echis pyramidum* and the Kenyan sand boa, *Eryx colubrinus* and BAF of Cu in the liver and kidney of the saw-scaled viper, *Echis pyramidum* were higher than 1. BAF of Ca, Fe, Zn and Mo were higher in the saw-scaled viper, *Echis pyramidum* than the Kenyan sand boa, *Eryx colubrinus*, while BAF of Zn was higher in the Kenyan sand boa, *Eryx colubrinus* than the saw-scaled viper, *Echis pyramidum* (Table 10), while BAF of non-essential metals were higher than 1 except BAF of Pb in muscle of the Kenyan sand boa, *Eryx colubrinus* (Table 11).

The variation of metal bioavailability concentrations from soil to snakes was due to the trophic position of snakes within the food web (**Murray, 2003**). **Hsu et al. (2006)** indicated that BAF of metals < 1 was considered a clue that the surface soil was not contaminated with metals, in contrast; BAF of metals > 1 revealed that the tissues of snakes were highly uploaded with metals, particularly toxic metals and it was a proof of the polluted nature of terrestrial food chain.

Toxicity of metals can lead to cell dysfunction, which is considered a sign of necrosis (**Flora et al., 2008**). Metals can either increase or decrease enzymatic activities within the tissues and can lead to histopathological alterations in tissues (**Deore and Wagh, 2012**). Snakes, unlike the warm-blooded animals, have a poor ability to detoxify toxic heavy metals absorbed and inhaled, or ingested by them with contaminated food because of their low metabolic rates and relatively simple enzyme systems (**Walker and Ronis, 1989**). This may explain why they are more sensitive to heavy metals so histopathological alterations are induced (**Ganser et al., 2003**).

Liver of the saw-scaled viper, *Echis pyramidum* and the Kenyan sand boa, *Eryx colubrinus* showed liver fibrosis and this agreed with **Ganser et al. (2003)** study, which stated that liver fibrosis is the most remarkable pathology in snakes exposed to heavy metals contaminant.

**Schaffner (1998)** stated that chronic toxic injury resulting from environmental pollutants usually leads to liver fibrosis in snakes. Liver of the Kenyan sand boa, *Eryx colubrinus* was more damaged than liver of the saw-scaled viper *Echispyramidum*.

In short, snakes exposed to inorganic contaminants and ingest polluted diet exhibit liver pathology and alteration in liver structure (**Ganser et al., 2003**). Such abnormalities were conspicuous in nearly one-third of snakes exposed to the contaminated diet, yet exposed snakes otherwise appeared healthy (**Hopkins et al., 2002**).



The kidney of snakes seems to be an important heavy metals metabolizing organ, hence; nephrotoxicity is induced and is considered a target organ of heavy metal's accumulation (McClellan-Green *et al.*, 2005).

In the present study, kidney of saw-scaled viper, *Echis pyramidum* and Kenyan sand boa, *Eryx colubrinus* exhibited hypertrophy and vacuolization of distal convoluted tubules. Kidney of Kenyan sand boa, *Eryx colubrinus* was more damaged than kidney of saw-scaled viper, *Echis pyramidum*. Kidney has been extensively studied in the field of bioaccumulation by (Hopkins *et al.*, 2001; Hopkins *et al.*, 2002; Hopkins *et al.*, 2004; Hopkins *et al.*, 2005; Burger *et al.*, 2005; Campbell *et al.*, 2005; Rezaie-Atagholipour *et al.*, 2012 and Sereshk and Bakhtiari, 2015).

Snakes are considered the best reptilian model for studying reproductive toxicity because they reach reproductive maturity faster than any other reptiles, so they can be better choice for reproductive studies (Willingham, 2005).

Both saw-scaled viper, *Echis pyramidum* and Kenyan sand boa, *Eryx colubrinus* exhibit degeneration of seminiferous tubules. Bioaccumulation of heavy metals in testes has been studied by (Hopkins *et al.*, 2001; Hopkins *et al.*, 2002; Hopkins *et al.*, 2005 and Burger *et al.*, 2005).

#### **Conclusion:**

The relationship between the accumulations of heavy metals in different tissues is considered valuable in understanding the ecotoxicology of snakes and enhances our knowledge of the bioavailability cycles of the heavy metals. The demand of understanding the factors that influence heavy metals exposure, bioaccumulation and the consequences of toxic metals on biology and ecology of snakes have been increased. In this report, biological studies and media (soil) through which heavy metals are transmitted to the snakes are investigated to help in the choice of the most suitable bioindicator. According to field observation; saw-scaled viper, *Echis pyramidum* is diverse, while Kenyan sand boa, *Eryx colubrinus* is scarce. Results of the present investigation showed that the saw-scaled viper, *Echis pyramidum* can withstand hard conditions more than the Kenyan sand boa, *Eryx colubrinus*. Therefore, Kenyan sand boa, *Eryx colubrinus* is considered the most suitable bioindicator monitoring heavy metals as environmental contaminants.

In Egypt, both saw-scaled viper, *Echis pyramidum* and Kenyan sand boa, *Eryx colubrinus* were classified as Least Concern, but as a measure of their conservation status in their contaminated habitat, a Red Spot in the IUCN Red List of saw-scaled viper, *Echis pyramidum* and Kenyan sand boa, *Eryx colubrinus* was suggested to categorized them as Near Threatened and Vulnerable, respectively (IUCN, 2005).

#### **Reference:**

**Abd Elgawad, M.; Mohamed, H. A. A.; Shendi, M. M. and Ghabour, S. I. (2007):** Status of some heavy metals in Fayoum district soils. The third Conference for Sustainable Agricultural Development, Faculty of Agriculture, Fayoum University, pp. 507-526.

**Abdel Kawy, W. A. and Belal, A. (2012):** Spatial analysis techniques to survey the heavy metals content of the cultivated land in El-Fayoum depression, Egypt. *Arabian Journal of Geosciences*, **5(6)**: 1247-1258.

**Albers, P. H.; Heinz, G. H. and Hall, R. J. (2000):** Approaches for assessment of terrestrial vertebrate responses to contaminants: moving beyond individual Organisms. In: Environmental Contaminants in Terrestrial Vertebrates: Effects on Populations, Communities, and Ecosystems, edited by **Albers, P. H.; Heinz, G. H. and Ohlendorf, H.M. (Eds.)**, SETAC Press, Pensacola, FL, pp. 109-148.

- Albrecht, J.; Abalos, M. and Rice, T. M. (2007):** Heavy metal levels in ribbon snakes (*Thamnophis sauritus*) and anuran larvae from the Mobile-Tensaw river delta, Alabama, USA. *Archives of Environmental Contamination and Toxicology*, **53**: 647–654.
- Alleman, A. R.; Jacobson, E. R. and Raskin, R. E. (1999):** Morphologic, cytochemical staining, and ultrastructural characteristics of blood cells from eastern diamondback rattlesnakes (*Crotalus adamanteus*). *American Journal of Veterinary Research*, **60**(4): 507–514.
- Bancroft, J. D. and Gamble, M. (2002):** Theory and practice of histological techniques (edited by Jones, M. L.: lipids and Tolly, B. A.: mucins). 5th edition Churchill Livingstone, London, Edinburgh., New York, Philadelphia, St Louis Sydney, Toronto.
- Burger, J. (1992):** Trace element levels in Pine snake hatchlings: Tissue and Temporal differences. *Archives of Environmental Contamination and Toxicology*, **22**: 209-213.
- Burger, J.; Campbell, K. R.; Campbell, T. S.; Shukla, T.; Jeitner, C. and Gochfeld, M. (2005):** Use of skin and blood as nonlethal indicators of heavy metal contamination in northern water snake (*Nerodia sipedon*). *Archives of Environmental Contamination and Toxicology*, **49**: 232-238.
- Burger, J.; Campbell, K. R.; Murray, S.; Campbell, T. S.; Gaines, K. F.; Jeitner, C.; Shukla, T.; Burke, S. and Gochfeld, M. (2007):** Metal levels in blood, muscle and liver of water snakes (*Nerodia* spp.) from New Jersey, Tennessee and South Carolina. *Science of the Total Environment*, **373**: 556–563.
- Burger, J.; Murray, S.; Gaines, K. F.; Novak, J. M.; Punshon, T.; Dixon, C. and Gochfeld, M. (2006):** Element levels in snakes in South Carolina: difference between a control site and exposed site on the Savannah River site. *Environmental Monitoring and Assessment*, **112**: 35–52.
- Campbell K. R. and Campbell T. S. (2001):** The accumulation and effects of environmental contaminants on snakes: a review. *Environmental Monitoring and Assessment*, **70**(3): 253–301.
- Campbell, K. R.; Campbell, T. S. and Burger, J. (2005):** Heavy metal concentrations in northern water snakes (*Nerodia sipedon*) from East Fork Poplar Creek and the Little River, East Tennessee, USA. *Archives of Environmental Contamination and Toxicology*, **49**: 239–248.
- Campbell, T. W. (2004):** Blood chemistry of Lower Vertebrates. In: ACVP and ASVCP (eds.), 55<sup>th</sup> Annual meeting of the American College of Veterinary Pathologists (ACVP) and 39<sup>th</sup> Annual Meeting of the American Society of Clinical Pathology (ASCP). American College of Veterinary Pathologists and American Society for Veterinary Clinical Pathology, Middleton, WI. Available form: <http://www.ivis.org/proceedings/ACVP/2004/Campbell2/> IVIS.pdf
- Chandavar, V. R. and Naik, P. R. (2004):** Variation in plasma glucose and pancreatic  $\beta$  cells in the turtle, *Lissemys punctate* (order: Chelonia; family: Trionychidae). *Acta Zoologica (Stockholm)*, **85**(2): 113-118.
- Cocking, D.; Hayes, R.; King, M. L.; Rohrer, M. J.; Thomas, R. and Ward, D. (1991):** Compartmentalization of mercury in biotic components of terrestrial foodplain ecosystems adjacent to the South River at Waynesboro, VA. *Water, Air, & Soil Pollution*, **57**(1): 159-170.
- Coz-Rakovac, R.; Lisicic, D.; Smuc, T.; Popovic, N. T.; Strunjak-Perovic, I; Jadan, M.; Tadic, Z. and Dujakovic, J. J. (2011):** Classification modeling of

physiological stages in captive Balkan whip snakes using blood biochemistry parameters. *Journal of Herpetology*, **45(4)**: 525-529.

**Cristol, D. A.; Brasso, R. L.; Condon, A. M.; Fovargue, R. E.; Friedman, S. L.; Hallinger, K. K.; Monroe, A. P. and White, A. E. (2008)**: The movement of aquatic mercury through terrestrial food webs. *Science*, **320(5874)**: 335.

**Dai, J.; Becquer, T.; Rouille, J. H.; Reversat, G.; Bernhard-Reversat, F.; Nohmani, J. and Lavelle, P. (2004)**: Heavy metal accumulation by two earthworm species and its relationship to total and DTPA-extractable metals in soils. *Soil Biology and Biochemistry*, **36(1)**: 91-98.

**Dessauer, H. C. (1970)**: Blood chemistry of reptiles: physiological and evolutionary aspects. In: *Biology of Reptilia*, vol. 3, Morphology, **Gans, C. (Edn.)**, Academic Press, London-New York, pp. 1-72.

**Deore, S. V. and Wagh, S. B. (2012)**: Heavy metal induced histopathological alterations in liver of *Channa gaucha* (Ham). *Journal of Experimental Sciences*, **3(3)**: 35-38.

**Drabkin, D. L. and Austin, J. H. (1932)**: Spectrophotometric studies I. Spectrophotometric constants for common hemoglobin derivatives in human, dog and rabbit blood. *Journal of Biological Chemistry*, **98**: 719-733.

**Drewett, D. V. V.; Willson, J. D.; Cristol, D. A.; Chin, S. Y. and Hopkin, W. A. (2013)**: Inter- and intraspecific variation in mercury bioaccumulation by snakes inhabiting a contaminated river floodplain. *Environmental Toxicology and Chemistry*, **32(5)**: 1178-1186.

**El Din, S. B. (2006)**: A Guide to Reptiles and Amphibians of Egypt. American University in Cairo Press, Cairo, pp. 1-320.

**Flora, S. J.; Mittal, M. and Mehta, A. (2008)**: Heavy metal induced oxidative stress & its possible reversal by chelation therapy. *Indian Journal of Medical Research*, **128(4)**: 501-523.

**Flower, S. S. (1933)**: Notes on the recent reptiles and amphibians of Egypt, with a list of the species recorded from that kingdom. *Proceedings of the Zoological Society of London*, **1933**: 735-851.

**Gaines, K. F.; Romanek, C. S.; Boring, C. S.; Lord, C. G.; Gochfeld, M. and Burger, J. (2002)**: Using raccoons as an indicator species for metal accumulation across trophic levels a stable isotope approach. *The Journal of Wildlife Management*, **66(3)**: 808-818.

**Ganser, L. R.; Hopkins, W. A.; O'Neil, L.; Shannon, H.; Roe, J. H. and Sever, D. A. (2003)**: Liver histopathology of the southern watersnake, *Nerodia fasciata fasciata*, following chronic exposure to trace element-contaminated prey from a coal ash disposal site. *Journal of Herpetology*, **37(1)**: 219-226.

**Gavric, J. P.; Prokic, M. D.; Anđelković, M. Z.; Despotović, S. G.; Gavrilović, B. R.; Borković-Mitić, S. S.; Radovanović, T. B.; Tomović, L. M.; Pavlović, S. Z. and Sačić, Z. S. (2015)**: Effects of metals on blood oxidative stress biomarkers and acetylcholinesterase activity in dice snakes (*Natrix tessellate*) from Serbia. *Archives of Biological Sciences*, Belgrade **67(1)**: 303-315.

**Gibbons, J. W.; Scott, D. E.; Ryan, T. J.; Buhlmann, K. A.; Tuberville, T. D.; Metts, B. S.; Greene, J. L.; Mills, T.; Leiden, Y.; Poppy, S. and Winne, C. T. (2000)**: The global decline of reptiles, déjà vu amphibians. *BioScience*, **50**: 653-666.

**Gómez, A.; Arroyo, C.; Astorga, W.; Chacón, D.; Rodríguez, S. and Jiménez, M. (2016)**: Hematological and biochemical reference intervals for *Bothrops asper* and *Crotalus simus* (Serpentes: Viperidae), maintained in captivity for venom extraction. *Comparative Clinical Pathology*, **25(3)**: 615-623.

**Gornall, A. G.; Bardawill, C. J. and David, M. M. (1949):** Determination of serum proteins by means of the biuret reaction. *Journal of Biological Chemistry*, **177**: 751-766.

**Gupta, P. K. (1977):** Hematological techniques. 4th edition Syndicate, India, pp. 231.

**Hayes, W. K.; Herbert, S. S.; Rehling, G. C. and Gennaro, J. F. (2002):** Factors that influence venom expenditure in viperids and other snake species during predatory and defensive contexts. In: Biology of vipers, edited by **Schuett, G. W.; Höggren, M.; Douglas, M. E. and Greene, H. W. (Eds.)**, Eagle Mountain Publishing, LC. 580 pp. 16 plates. ISBN 09720154-0-X.

**Hidalgo-Vila, J.; Díaz-Paniagua, C.; de Frutos-Escobar, C.; Jiménez-Martínez, C. and Pérez-Santigosa, N. (2007 b):** Salmonella in free living terrestrial and aquatic turtles. *Veterinary Microbiology*, **119(2-4)**: 311-315.

**Hopkins, W. A. (2000):** Reptile toxicology: challenges and opportunities on the last frontier in vertebrate ecotoxicology. *Environmental Toxicology and Chemistry*, **19(10)**: 2391-2393.

**Hopkins, W. A.; Roe, J. H.; Snodgrass, J. W.; Jackson, B. P.; Kling, D. E.; Rowe, C. L. and Congdon, J. D. (2001):** Nondestructive indices of trace element exposure in Squamata reptiles. *Environmental Pollution*, **115**: 1-7.

**Hopkins, W. A.; Roe, J. H.; Snodgrass, J. W.; Staub, B. P.; Jackson, B. P. and Congdon, J. D. (2002):** Effects of chronic dietary exposure to trace elements on banded water snakes (*Nerodia fasciata*). *Environmental Toxicology and Chemistry*, **21(5)**:906-913.

**Hopkins, W. A.; Rowe, C. L. and Congdon, J. D. (1999):** Elevated trace element concentrations and standard metabolic rate in banded water snakes (*Nerodia fasciata*) exposed to coal combustion wastes. *Environmental Toxicology and Chemistry*, **18(6)**: 1258-1263.

**Hopkins, W. A.; Snodgrass, J. W.; Baionno, J. A.; Roe, J. H.; Staub, B. P. and Jackson, B. P. (2005):** Functional relationships among selenium concentrations in the diet, target tissues, and nondestructive tissue samples of two species of snakes. *Environmental Toxicology and Chemistry*, **24 (2)**: 344-351.

**Hopkins, W. A.; Staub, B. P.; Baionno, J. A.; Jackson, B. P.; Roe, J. H. and Ford, N. B. (2004):** Trophic and maternal transfer of selenium in brown house snakes (*Lamprophis fuliginosus*). *Ecotoxicology and Environmental Safety*, **58**: 285-293.

**Hsu, M. J.; Selvaraj, K. and Agoramorthy, G. (2006):** Taiwan's industrial heavy metal pollution threatens terrestrial biota. *Environmental pollution*, **143(2)**: 327-334.

**Irwin, L. and Irwin, K. (2005):** Global threats affecting the status of reptile population. In: Toxicology of Reptiles, edited by **Gardner, S. C. and Oberdörster, E. (Eds.)**, Taylor & Francis Group Boca Raton London New York, pp. 9-34.

**IUCN (2005):** Global reptile assessment. Species account for Mediterranean species.

**Kadry, M. A. M. (2011):** Ecological and Biological studies in the lizard; *Laudakia stellio* inhabiting different geographical habitats. PhD Thesis. Zoology department Faculty of Science Cairo University.

**Lord, C. G.; Gaines, K. F.; Boring, C. S.; Brisbin, I. L.; Gochfeld, M. and Burger, J. (2002):** Raccoon (*Procyon lotor*) as a bioindicator of mercury contamination at the U.S. Department of Energy's Savannah River Site. *Archives of Environmental Contamination and Toxicology*, **43(3)**: 356-363.

**Martínez, S. A.; Rodríguez, D. M. A.; Mateo, J. A.; Pastor, J.; Marco, I.; Lavin, S. and Cuenca, R. (2004):** Comparative hematology and blood chemistry of endangered lizards (*Gallotia* species) in the Canary Islands. *Veterinary Record*, **155(9)**: 266-269.

- Olafisoye, O. B.; Adefioye, T. and Osibote, O. A. (2013):** Heavy metal concentration of water, soil and plants around an electronic waste dumpsite. *Polish Journal of Environmental Studies*, **22(5)**: 1431-1439.
- McClellan-Green, P.; Celander, M. and Oberdörster, E. (2005):** Hepatic, Renal and Adrenal Toxicology. In: Toxicology of Reptiles, edited by **Gardner, S. C. and Oberdörster, E. (Eds.)**, Taylor & Francis Group, LLC pp. 123-148.
- Mehrtens, J. M. (1987):** Living Snakes of the World in Color. New York: Sterling Publishers. Pp. 480 ISBN 0-8069-6460-X.
- Mountouris, A.; Voutsas, E. and Tassios, D. (2002):** Bioconcentration of heavy metals in aquatic environments: the importance of bioavailability. *Marine Pollution Bulletin*, **44**: 1136-1141.
- Murray, S. (2003):** 'Can exposure models predict endpoint effects: A case study using snakes', *Ph.D. Dissertation*, Rutgers University, Piscataway, New Jersey.
- Nasseem M. G. and Abdalla Y. H. (2003):** Cobalt status in the North Western Coast Soils of Egypt in relation to cobalt content of barley for ruminants. 6<sup>th</sup> International Symposium on Environmental Biogeochemistry, Edinburgh.
- Ozzetti, P. A.; Cavlac, C. L. and Sano-Martins, I. S. (2015):** Hematological reference values of the snakes *Oxyrhopus guibei* and *Xenodon newwiedii* (Serpentes: Dipsadidae). *Comparative Clinical Pathology*, **24(1)**: 101-108.
- Pal, A.; Parida, S. P. and Swain, M. M. (2008):** Hematological and plasma biochemistry in fan throated lizard *Sitana ponticeriana* (Sauria: Agamidae). *Russian Journal of Herpetology*, **15(2)**: 110–116.
- Parida, S. P.; Dutta, S. K. and Pal, A. (2014):** Hematology and plasma biochemistry of wild-caught Indian cobra *Naja naja* (Linnaeus, 1758). *Journal of venomous animal and toxins including Tropical Diseases*, **20**:14.
- Rainwater, T. R.; Reynolds, K. D.; Cañas, J. E.; Cobb, G. P.; Anderson, T. A.; McMurry, S. T. and Smith, P. N. (2005):** Organochlorine pesticides and mercury in cottonmouth (*Agkistrodon piscivorus*) from northeastern Texas, USA. *Environmental Toxicology and Chemistry*, **24(3)**: 665-673.
- Rezaie-Atagholipour, M.; Riyahi-Bakhtiari, A.; Sajjadi, M.; Yap, C. K.; Ghaffari, S.; Ebrahimi-Sirizi, Z. and Ghezellou, P. (2012):** Metal concentrations in selected tissues and main prey species of the annulated sea snake (*Hydrophis cyanocinctus*) in the Hara protected Area, northeastern coast of the Persian Gulf, Iran. *Marine Pollution Bulletin*, **64**: 416-421.
- Saleh, M. A. (1997):** Amphibians and Reptiles of Egypt. Arab Republic of Egypt, Cabint of Ministers, Ministry of State for Environmental Affairs, Egyptian Environmental Affairs Agency, Publication of National Biodiversity Unit. No. 6, pp. 1-234.
- Schaffner, F. (1998):** The liver. In Biology of the Reptilia. Vol. 19. Morphology G Visceral Organs, edited by **Gans, C. and Gaunt, A. S. (Eds.)**, Society for the Study of Amphibians and Reptiles, Ithaca, NY, pp. 485-531.
- Selcer, K. W. (2005):** Reptile Ecotoxicology: Studying the effects of contaminants on populations. In: Toxicology of Reptiles, edited by **Gardner, S. C. and Oberdörster, E. (Eds.)**, Taylor & Francis Group, Boca Raton London New York, pp. 267-297.
- Sereshk, Z. H. and Bakhtiari, A. R. (2015):** Concentrations of trace elements in kidney, liver, muscle and skin of short sea snake (*Lapemis curtus*) from the Strait of Hormuz Persian Gulf. *Environmental Science and Pollution Research*, **22**: 15781-15787.

**Soltanpour, P. N. and Schwab, A. P. (1977):** A new soil test for simultaneous extraction of macro- and micro- nutrients in alkaline soils. *Communications in Soil Science and Plant Analysis*, **8(3)**: 195-207.

**Sparling, D.W.; Bishop, C. A.; Pauli, B. D. and Money, S. (2000):** Epilogue: Lessons to be learned. In: *Ecotoxicology of Amphibians and Reptiles*, edited by Sparling, D.W., Linder, G. and Bishop, C.A. (Eds.), SETAC Press, Pensacola, FL, pp. 811.

**Sparling, D. W.; Linder, G.; Bishop, C. A. and Krest, S. K. (2010):** Recent advancement in amphibian and reptile ecotoxicology, In: *Ecotoxicology of Amphibians and Reptiles*, edited by D. W.; Linder, G.; Bishop, C. A. and Krest, S. (Eds.), *Ecotoxicology of Amphibians and Reptiles*, 2<sup>nd</sup> edn. Taylor & Francis, New York, NY, USA, pp. 1-12.

**Stidworthy, J. (1974):** Snakes of the World. Grosset & Dunlap. ISBN 0-44811856-4.

**Todd, B. D.; Willson, J. D. and Gibbons, J. W. (2010):** The global status of reptiles and causes of their decline. In: *Ecotoxicology of Amphibians and Reptiles*, edited by Donald, W.; Sparling, G. L.; Bishop, C. A. and Krest, S. K., (Eds.), 2nd ed. Taylor & Francis, New York, NY, USA, pp. 47–67.

**Tosunoğlu, M.; Gül, Ç.; Yilmaz, N. and Topyildiz, H. (2011):** Hematological reference intervals of some snake species in Turkey. *Turkish Journal of Zoology*, **35(2)**: 237-243.

**Trinder, P. (1969):** Determination of glucose in blood using glucose oxidase with an alternative oxygen acceptor. *Annals of Clinical Biochemistry*, **6**: 24-25.

**Vasaruchapong, T.; Disarapong, P.; Chulasugandha, P.; Khow, O.; Chanhome, L.; Chiobamroongkiat, M.; Chaiyabutr, N. and Sitprija, V. (2013):** Comparative studies on hematological and plasma biochemical parameters in different types of venomous snakes in Thailand. *Comparative Clinical Pathology*, **23(4)**: 955-959.

**Walker, C. H. and Ronis, M. J. J. (1989):** The monooxygenases of birds, reptiles and amphibians. *Xenobiotica*, **19(10)**: 1111-1121.

**Walker, C. H.; Sibly, R. M.; Hopkin, S. P. and Peakall, D. B. (2012):** Principles of ecotoxicology. 4<sup>th</sup> edition New York: Taylor & Francis, pp. 386

**Wilkinson, R. (2003):** Clinical pathology. In: *Medicine and surgery of tortoises and turtles*, edited by McArthur, S.; Wilkinson, R. and Meyer, J. (Eds.). Blackwell Publishing, Oxford, UK, pp.141-186.

**Willingham, E. (2005):** Developmental and reproductive effects. In: *Toxicology of Reptiles*, edited by Gardner, Susan C. and Oberdörster, Eva. (Eds.), Taylor & Francis Group, LLC. Pp. 149-171.

**Wylie, G. D.; Hothem, R. L.; Bergen, D. R.; Martin, L. L.; Taylor, R. J. and Brussee, B. E. (2009):** Metal and trace elements in giant garter snakes (*Thamnophis gigas*) from the Sacramento Valley, California, USA. *Archives of Environmental Contamination and Toxicology*, **56**: 577–587.

**Zöllner, N. and Kirsch, K. (1962):** Über die quantitative bestimmung von lipoiden (Mikromethode) mittels der vielen natürlichen lipoiden (allen bekannten plasmalipoiden) gemeinsamen sulphophosphovanillin-reaktion. *Zeitschrift für die gesamte experimentelle Medizin*, **135**: 545-561.
